# Supplementary material for: Phylogenetic and Phylodynamic Analysis of Delta Strains Circulating in Italy
Source: MDPI journal article supplement (doi:10.3390/v15091791), 2023-08-23
Supplement: s1 [file s1]

## List of HDV Reference Sequences

MK976686\_gen1\_CG\_Pakistan\_Jan\_2018, MK976678\_gen1\_CG\_Pakistan\_Dec\_2017, MK976687\_gen1\_CG\_Pakistan\_Jan\_2018, MK976661\_gen1\_CG\_Pakistan\_Aug\_2017, MK890233\_gen1\_CG\_Pakistan\_Sep\_2018, MK976676\_gen1\_CG\_Pakistan\_Nov\_2017, MK976685\_gen1\_CG\_Pakistan\_Jan\_2018, MK976667\_gen1\_CG\_Pakistan\_Sep\_2017, MK976693\_gen1\_CG\_Pakistan\_Feb\_2018, MK976684\_gen1\_CG\_Pakistan\_Jan\_2018, MK976675\_gen1\_CG\_Pakistan\_Nov\_2017, MK976664\_gen1\_CG\_Pakistan\_Aug\_2017, MK890229\_gen1\_CG\_Pakistan\_Sep\_2018, MK976680\_gen1\_CG\_Pakistan\_Dec\_2017, MK976683\_gen1\_CG\_Pakistan\_Jan\_2018, MK976671\_gen1\_CG\_Pakistan\_Oct\_2017, MK976669\_gen1\_CG\_Pakistan\_Oct\_2017, MK976679\_gen1\_CG\_Pakistan\_Dec\_2017, MK976665\_gen1\_CG\_Pakistan\_Aug\_2017, MK976663\_gen1\_CG\_Pakistan\_Aug\_2017, MK976677\_gen1\_CG\_Pakistan\_Dec\_2017, MK976666\_gen1\_CG\_Pakistan\_Sep\_2017, MK976682\_gen1\_CG\_Pakistan\_Dec\_2017, MK976691\_gen1\_CG\_Pakistan\_Feb\_2018, KJ744241\_gen1\_CG\_Iran\_Feb\_2008, KY463677\_gen1\_CG\_Ethiopia\_2013, MG711800\_gen1\_CG\_Cameroon\_2012, KM110795\_gen1\_CG\_Cameroon\_, LT594473\_gen1\_CG\_dFr2025\_CenAfrRep\_, KM110790\_gen1\_CG\_Cameroon\_, MG711668\_gen1\_CG\_Cameroon\_2014, MG711712\_gen1\_CG\_Cameroon\_2013, JX888109\_gen1a\_CG\_Chad\_2006, LT594478\_gen1\_CG\_dFr6155\_Cameroon, KM110791\_gen1\_CG\_Cameroon, KM110800\_gen1\_CG\_Cameroon, KM110796\_gen1\_CG\_Cameroon, KM110798\_gen1\_CG\_Cameroon, MG711717\_gen1\_CG\_Cameroon\_2014, KM110801\_gen1\_CG\_Cameroon\_, MG711743\_gen1\_CG\_Cameroon\_2013, MG711747\_gen1\_CG\_Cameroon\_2013, JX888113\_gen1\_CG\_CenAfrRep\_2009, MG711693\_gen1\_CG\_Cameroon\_2014, MG711681\_gen1\_CG\_Cameroon\_2014, MG711664\_gen1\_CG\_Cameroon\_2016, MG711759\_gen1\_CG\_Cameroon\_2015, MG711686\_gen1\_CG\_Cameroon\_2016, MG711675\_gen1\_CG\_Cameroon\_2013, MG711787\_gen1\_CG\_Cameroon\_2011, MG711738\_gen1\_CG\_Cameroon\_2013, MG711722\_gen1\_CG\_Cameroon\_2015, MG711721\_gen1\_CG\_Cameroon\_2015, MG711746\_gen1\_CG\_Cameroon\_2013, MG711692\_gen1\_CG\_Cameroon\_2016, MG711757\_gen1\_CG\_Cameroon\_2014, MG711761\_gen1\_CG\_Cameroon\_2015, MG711674\_gen1\_CG\_Cameroon\_2013, MG711769\_gen1\_CG\_Cameroon\_2016, MG711661\_gen1\_Partial\_CG\_Cameroon\_2016, MG711662\_gen1\_Partial\_CG\_Cameroon\_2016, MG711756\_gen1\_CG\_Cameroon\_2014, MG711744\_gen1\_CG\_Cameroon\_2016, MG711745\_gen1\_CG\_Cameroon\_2016, MG711665\_gen1\_CG\_Cameroon\_2016, MG711663\_gen1\_CG\_Cameroon\_2015, AM779574\_dFr508\_1a\_GuineaBissau\_2006, MG711732\_gen1\_CG\_Cameroon\_2016, MG711676\_gen1\_CG\_Cameroon\_2013, MG711778\_gen1\_CG\_Cameroon\_2011, MG711785\_gen1\_CG\_Cameroon\_2011, MG711802\_gen1\_CG\_Cameroon\_2013, MG711696\_gen1\_CG\_Cameroon\_2013, JX888100\_gen1\_CG\_Nigeria\_2006, JX888101\_gen1a\_CG\_Nigeria\_2006, AM902178\_dFr2040\_1a\_Madagascar\_2006, MH457149\_gen1\_CG\_Germany, AM779592\_dTk8\_1a\_Turkey\_2006, U81988\_gen1a\_CG\_Somalia\_1995, KY463682\_gen1\_CG\_Ethiopia\_2013, U81989\_gen1\_CG\_Ethiopia\_, KY463681\_gen1\_CG\_Ethiopia\_2013, KM110792\_gen1\_CG\_Cameroon\_, KM110794\_gen1\_CG\_Cameroon\_, LT594476\_gen1\_CG\_dFr5405\_CenAfrRep\_, LT703299\_gen1\_CG\_RDC\_13\_168\_Congo, MG711748\_gen1\_CG\_Cameroon\_2013, MG711774\_gen1\_CG\_Cameroon\_2013, MG711797\_gen1\_CG\_Cameroon\_2010, MG711793\_gen1\_CG\_Cameroon\_2011, MG711752\_gen1\_CG\_Cameroon\_2013, MG711775\_gen1\_CG\_Cameroon\_2013, MG711792\_gen1\_Partial\_CG\_Cameroon\_2011, MG711678\_gen1\_CG\_Cameroon\_2013, MG711805\_gen1\_CG\_Cameroon\_2015, MG711753\_gen1\_CG\_Cameroon\_2013, MG711666\_gen1\_CG\_Cameroon\_2016, MG711762\_gen1\_CG\_Cameroon\_2016, MG711726\_gen1\_CG\_Cameroon\_2016, MG711705\_gen1\_CG\_Cameroon\_2016, MG711718\_gen1\_CG\_Cameroon\_2015, MG711704\_gen1\_CG\_Cameroon\_2016, MG711701\_gen1\_CG\_Cameroon\_2015, AM902169\_dFr2236\_1b\_Congo\_2006, MG711694\_gen1\_CG\_Cameroon\_2015, MG711803\_gen1\_CG\_Cameroon\_2014, MG711755\_gen1\_CG\_Cameroon\_2014, MG711700\_gen1\_CG\_Cameroon\_2015, AM902167\_dFr2201\_1b\_Congo, MG711698\_gen1\_CG\_Cameroon\_2015, MG711764\_gen1\_CG\_Cameroon\_2016, AM902168\_dFr2045\_1b\_IvoryCoast, JX888098\_gen1\_CG\_Nigeria\_2004, JX888099\_gen1\_CG\_Nigeria\_2006, JX888105\_gen1b\_CG\_Nigeria\_2006, JX888111\_gen1\_CG\_CenAfrRep\_2009, JX888108\_gen1\_CG\_Chad\_2007, KM110793\_gen1\_CG\_Cameroon\_, LT594479\_gen1\_CG\_dFr677\_CenAfrRep\_, LT604950\_gen1\_CG\_0866dTn05\_Tunisia\_, MH457148\_gen1\_CG\_Germany\_, HQ005365\_gen1\_CG\_Turkey\_, HQ005368\_gen1\_CG\_Turkey\_, AM779583\_dTk10\_1b\_Turket, HQ005370\_gen1\_CG\_Turkey\_, JX888110\_gen1\_CG\_CenAfrRep\_2009,

JX888112\_gen1\_CG\_CenAfrRep\_2009, MG711740\_gen1\_CG\_Cameroon\_2016, MH457154\_gen1\_CG\_Italy\_,  
MK890235\_gen1\_CG\_Pakistan\_Sep\_2018, MK890232\_gen1\_CG\_Pakistan\_Sep\_2018,  
MK890230\_gen1\_CG\_Pakistan\_Sep\_2018, MK890228\_gen1\_CG\_Pakistan\_Sep\_2018,  
MK890234\_gen1\_CG\_Pakistan\_Sep\_2018, KJ744237\_gen1d\_CG\_Iran\_Feb\_2008,  
MK890227\_gen1\_CG\_Pakistan\_Sep\_2018, KJ744234\_gen1\_CG\_Iran\_Feb\_2008, M28267\_gen1\_CG,  
MH457142\_gen1\_CG\_Spain\_, D01075\_gen1\_CG, NC\_001653\_gen1\_CG, LT604935\_gen1\_CG\_dFr2110\_Cameroon,  
MH457151\_gen1\_CG\_Italy, AF008398\_Italy\_1997, AM902165\_dFr2172\_1d\_France\_2006,  
AM779587\_dTk7\_1e\_Turkey\_2006, AM902179\_dFr2042\_1d\_Italy\_2006, MH457151\_Italy\_2018,  
AM902177\_dFr2012\_1d\_France\_2006, KJ744230\_gen1\_CG\_Iran\_Oct\_2004, MH457144\_gen1\_CG\_Germany\_,  
M55042\_gen1\_CG, MK124579\_gen1\_CG\_Italy\_1984, X04451\_gen1e\_CG\_1986, M21012\_gen1\_CG,  
AJ307077\_gen1\_CG\_woodchuck5\_Italy\_, AJ000558\_gen1\_CG, HM046802\_gen1\_CG\_China\_21\_Dec\_2009,  
LT604938\_gen1\_CG\_1e\_Portugal\_2016, AF008407\_Italy\_1997, LT594480\_gen1\_CG\_dFr6801\_Romania\_2015,  
AF008326\_Greece\_1997, LT594479\_dFr677\_1b\_CenAfrRep\_2015, LT604943\_gen1\_CG\_dFr5177\_France\_,  
AF008409\_Italy\_1997, LT604943\_dFr5177\_1e\_France\_2015, LT604944\_gen1\_CG\_dFr8336\_France\_,  
MH457147\_gen1\_CG\_Germany\_, X85253\_gen1\_CG, AM902175\_dFr2406\_1d\_France\_2007,  
MH457143\_gen1\_CG\_Spain\_, LT604936\_gen1\_CG\_dFr2136\_France\_, KJ744220\_gen1\_CG\_Iran\_Aug\_2007,  
KJ744221\_gen1\_CG\_Iran\_Sep\_2007, KJ744222\_gen1\_CG\_Iran\_Apr\_2008, KJ744223\_gen1\_CG\_Iran\_Dec\_2008,  
AB118848\_Japan\_1e\_2002, KJ924996\_Vietnam\_2014, KR363257\_gen1\_CG\_1048\_China\_,  
KR363258\_gen1\_CG\_1054\_China\_, X77627\_gen1\_CG, KR363259\_gen1\_CG\_255\_China\_, X77627\_Chine\_1993\_1e,  
AF008388\_Italy\_1997, AF008319\_Romania, KF660600\_gen1\_CG\_Viet\_Nam\_, AB118849\_gen1\_CG\_Nagasaki\_JA-  
N2\_Japan\_, KF660601\_gen1\_CG\_Viet\_Nam\_, KF660602\_gen1\_CG\_Viet\_Nam\_,  
AF104263\_gen1\_CG\_TW2667\_Taiwan\_, HW649776\_gen1\_CG, AF425644\_gen1\_CG, AY648959\_gen1\_CG\_Taiwan\_,  
AY648958\_gen1\_CG\_Taiwan\_, AY648956\_gen1\_CG\_Taiwan\_, AY648957\_gen1\_CG\_Taiwan\_,  
AF008383\_Italy\_1997, AF008386\_Italy\_1997, AM902174\_dFr2404\_1b\_France\_2006,  
AM779581\_dTk1\_1d\_Turkey\_2006, MH791027\_gen1\_CG\_Russia\_Jul\_2017, MH791029\_gen1\_CG\_Russia\_Jul\_2017,  
LT604942\_dFr5056\_1e\_Russia\_2015, MH457145\_gen1\_CG\_Germany\_, MH457152\_gen1\_CG\_Italy\_,  
LT594475\_dFr5143\_Romania\_2016, MT583808\_Israel\_2020, LT604940\_gen1\_CG\_dFr4941\_France\_,  
HQ005372\_TR3\_1d\_Turkey\_2006, AF008311\_Albania\_1997, MH457153\_gen1\_CG\_Italy\_,  
M92448\_gen1\_CG\_Taiwan\_, MG926377\_gen1d\_CG\_Israel\_19-Dec\_2012, KT722840\_gen1\_CG\_China\_12-Aug\_2014,  
LT604937\_gen1\_CG\_dFr2410\_Mayotte, AF008413\_Italy\_1997, KJ744229\_gen1\_CG\_Iran\_Dec\_2008,  
KJ744245\_gen1\_CG\_Iran\_May\_2006, AY633627\_CG\_1d\_Iran\_2003, KJ744255\_gen1\_CG\_Iran\_Apr\_2003,  
KJ744249\_gen1\_CG\_Iran\_Mar\_2007, KJ744254\_gen1\_CG\_Iran\_Apr\_2008, KJ744248\_gen1d\_CG\_Iran\_Apr\_2010,  
KJ744247\_gen1\_CG\_Iran\_May\_2007, KJ744225\_gen1\_CG\_Iran\_Sep\_2007, KJ744226\_gen1\_CG\_Iran\_Sep\_2008,  
KJ744235\_gen1\_CG\_Iran\_Feb\_2008, KJ744240\_gen1e\_CG\_Iran\_Feb\_2008, KJ744242\_gen1\_CG\_Iran\_Feb\_2008,  
KJ744232\_gen1\_CG\_Iran\_Jul\_2006, KJ744224\_gen1\_CG\_Iran\_Feb\_2010, KJ744231\_gen1\_CG\_Iran\_Jun\_2009,  
LT604941\_gen1\_CG\_1d\_Poland\_2015, MG926381\_gen1d\_CG\_Israel\_25-Jun\_2015,  
KJ744244\_gen1\_CG\_Iran\_Aug\_2007, KJ744243\_gen1\_CG\_Iran\_Feb\_2007, KJ744256\_gen1\_CG\_Iran\_Oct\_2005,  
KJ744228\_gen1\_CG\_Iran\_Feb\_2008, KJ744227\_gen1\_CG\_Iran\_Jan\_2008, KJ744257\_gen1\_CG\_Iran\_Jan\_2008,  
MH457150\_gen1\_CG\_Germany\_, L22066\_gen1\_CG\_genotype\_I\_, KJ744238\_gen1\_CG\_Iran\_Feb\_2008,  
MH457146\_gen1\_CG\_Germany\_, KY495779\_gen1\_CG, MG926380\_gen1d\_CG\_Israel\_04-Jul\_2013,  
MH791028\_gen1\_CG\_Russia\_Tuva\_Republic\_Jul\_2017, MH791030\_gen1\_CG\_Russia\_Tuva\_Republic\_Jul\_2017,  
LT604949\_gen1\_CG\_1063dTn06\_Tunisia\_, LT604948\_gen1\_CG\_0062dTn11\_Tunisia\_,  
MK890226\_gen1\_CG\_Pakistan\_Aug\_2018, MK890231\_gen1\_CG\_Pakistan\_Sep\_2018,  
MG926379\_gen1d\_CG\_Israel\_01-Jan\_2013, MG926382\_gen1c\_CG\_Israel\_05-Apr\_2015,  
HQ005367\_gen1\_CG\_Turkey\_, HQ005371\_gen1\_CG\_Turkey\_, HQ005369\_gen1\_CG\_Turkey\_,  
HQ005366\_gen1\_CG\_Turkey\_, HQ005364\_gen1\_CG\_Turkey\_, MK976668\_gen1\_CG\_Pakistan\_Sep\_2017,  
MK976694\_gen1\_CG\_Pakistan\_Feb\_2018, MK976695\_gen1\_CG\_Pakistan\_Feb\_2018,  
MK976670\_gen1\_CG\_Pakistan\_Oct\_2017, KJ744216\_gen1\_CG\_Iran\_Jun\_2007, KJ744217\_gen1\_CG\_Iran\_Jun\_2008,  
KJ744215\_gen1\_CG\_Iran\_Jun\_2006, LC426721\_gen1\_CG\_Mongolia\_2018, LT594474\_gen1\_CG\_dFr2095\_China\_,  
MG926378\_gen1d\_CG\_Israel\_06-Feb\_2013, LT604946\_gen1\_CG\_dTk36\_Turkey\_,  
KJ744218\_gen1\_CG\_Iran\_May\_2006, LT604945\_gen1\_CG\_dFr8581\_China\_,  
LT594477\_gen1\_CG\_dFr5985\_Georgia\_, KJ744253\_gen1\_CG\_Iran\_Feb\_2007, KJ744214\_gen1\_CG\_Iran\_Mar\_2008,  
LT604951\_gen1\_CG\_1621dTn08\_Tunisia\_, M84917\_gen1\_CG\_Lebanon\_1\_, KJ744233\_gen1\_CG\_Iran\_Feb\_2008,  
KJ744250\_gen1\_CG\_Iran\_Oct\_2004, LT604939\_gen1\_CG\_dFr4586\_Romania\_, LC426722\_gen1\_CG\_Mongolia\_2018,  
KY379247\_gen1\_CG\_Canada\_08-Jul\_2015, KY379246\_gen1\_CG\_Canada\_06-Jan\_2015,  
MH844625\_gen1\_CG\_Pakistan\_Sep\_2017, MK976692\_gen1\_CG\_Pakistan\_Feb\_2018,

MK976681\_gen1\_CG\_Pakistan\_Dec\_2017, MK976689\_gen1\_CG\_Pakistan\_Jan\_2018,  
MK976690\_gen1\_CG\_Pakistan\_Jan\_2018, MK976673\_gen1\_CG\_Pakistan\_Nov\_2017,  
MK976672\_gen1\_CG\_Pakistan\_Oct\_2017, KY463680\_gen1\_CG\_Ethiopia\_2013, KY463678\_gen1\_CG\_Ethiopia\_2013,  
KM110797\_gen1\_CG\_Cameroon\_, KM110799\_gen1\_CG\_Cameroon\_, KY861354\_gen1\_CG\_Cameroon\_2009,  
LT604947\_gen1\_CG\_0687dTn10\_Tunisia\_, JX888104\_gen1\_CG\_Nigeria\_2006,  
MK976674\_gen1\_CG\_Pakistan\_Nov\_2017, AF098261\_gen1\_CG\_Canada\_Quebec\_,  
MK976662\_gen1\_CG\_Pakistan\_Aug\_2017, MK890224\_gen1\_CG\_Pakistan\_Apr\_2018,  
KY463679\_gen1\_CG\_Ethiopia\_2013, EF514903\_gen1\_CG\_Turkey\_, EF514904\_gen1\_CG\_Turkey\_,  
EF514907\_gen1\_CG\_Turkey\_, EF514905\_gen1\_CG\_Turkey\_, EF514906\_gen1\_CG\_Turkey\_,  
MK976688\_gen1\_CG\_Pakistan\_Jan\_2018, MG711767\_gen1\_CG\_Cameroon\_2016,  
MG711703\_gen1\_CG\_Cameroon\_2016, MG711716\_gen1\_CG\_Cameroon\_2013,  
MG711770\_gen1\_CG\_Cameroon\_2016, MG711766\_gen1\_CG\_Cameroon\_2016,  
KY861355\_gen1\_CG\_Cameroon\_2010, MG711683\_gen1\_CG\_Cameroon\_2016,  
MG711684\_gen1\_CG\_Cameroon\_2016, MG711736\_gen1\_CG\_Cameroon\_2016,  
MG711728\_gen1\_CG\_Cameroon\_2016, MG711798\_gen1\_CG\_Cameroon\_2010,  
MG711749\_gen1\_CG\_Cameroon\_2013, MG711794\_gen1\_CG\_Cameroon\_2011,  
MG711796\_gen1\_Partial\_CG\_Cameroon\_2011, MG711771\_gen1\_CG\_Cameroon\_2016,  
MG711720\_gen1\_CG\_Cameroon\_2015, MG711784\_gen1\_CG\_Cameroon\_2011,  
MG711737\_gen1\_CG\_Cameroon\_2016, MG711727\_gen1\_CG\_Cameroon\_2016,  
MG711801\_gen1\_CG\_Cameroon\_2013, MG711750\_gen1\_CG\_Cameroon\_2013,  
MG711690\_gen1\_CG\_Cameroon\_2016, MG711725\_gen1\_CG\_Cameroon\_2016,  
MG711691\_gen1\_CG\_Cameroon\_2016, MG711706\_gen1\_CG\_Cameroon\_2013,  
MG711731\_gen1\_CG\_Cameroon\_2016, MG711734\_gen1\_CG\_Cameroon\_2016,  
MG711667\_gen1\_CG\_Cameroon\_2016, MG711763\_gen1\_CG\_Cameroon\_2016,  
MG711672\_gen1\_CG\_Cameroon\_2013, MG711697\_gen1\_CG\_Cameroon\_2012,  
MG711713\_gen1\_CG\_Cameroon\_2013, KY861350\_gen1\_CG\_Cameroon\_04-Sep\_2008,  
MG711709\_gen1\_CG\_Cameroon\_2013, MG711687\_gen1\_CG\_Cameroon\_2016,  
MG711673\_gen1\_CG\_Cameroon\_2013, MG711776\_gen1\_CG\_Cameroon\_2011,  
MG711788\_gen1\_CG\_Cameroon\_2011, MG711733\_gen1\_CG\_Cameroon\_2016,  
MG711688\_gen1\_CG\_Cameroon\_2016, KY861351\_gen1\_CG\_Cameroon\_12-Jan\_2008, AX741149\_genotype\_5\_CG,  
JA417546\_genotype\_5\_CG, AJ584845\_genotype\_5\_CG\_strainFr-47\_countryGuinea\_2003,  
AX741154\_genotype\_5\_CG, JA417551\_genotype\_5\_CG, AM183326\_genotype\_5\_CG\_dFr2600\_Togo\_,  
LT604962\_genotype\_5\_CG\_dFr5334\_Guinea-Bissau\_2016, AX741159\_genotype\_5\_CG, JA417556\_genotype\_5\_CG,  
JX888107\_genotype\_5\_CG\_Nigeria\_2006, JX888103\_genotype\_5\_CG\_Nigeria\_2006,  
JX888106\_genotype\_5\_CG\_Nigeria\_2006, AM183328\_genotype\_5\_CG\_dFr2703\_Senegal\_,  
LT594482\_genotype\_5\_CG\_dFr3634\_Cote\_dIvoire\_, LT604959\_genotype\_5\_CG\_dFr4735\_Mali\_,  
LT604957\_genotype\_5\_CG\_dFr4410\_Mali\_, LT594483\_genotype\_5\_CG\_dFr7068\_Ghana\_,  
LT604963\_genotype\_5\_CG\_dFr7761\_Mali\_, AM183331\_genotype\_5\_CG\_dFr2005\_Guinea-Bissau\_,  
LT594472\_genotype\_5\_CG\_dFr3229\_Mali\_, LT604960\_genotype\_5\_CG\_dFr4824\_Mali\_,  
LT604956\_genotype\_5\_CG\_dFr4066\_Mali\_, LT604961\_genotype\_5\_CG\_dFr5026\_Guinea-Bissau\_,  
LT604958\_genotype\_5\_CG\_dFr4417\_Cote\_dIvoire\_, LT604967\_genotype\_6\_CG\_dFr7057\_Cameroon\_,  
LT604968\_gen1\_CG\_dFr7543\_Angola\_, LT604966\_genotype\_6\_CG\_dFr7029\_Cameroon\_,  
LT604965\_genotype\_6\_CG\_dFr3795\_Mali\_, LT594485\_genotype\_6\_CG\_dFr3046\_Cameroon\_,  
AM183329\_genotype\_6\_CG\_dFr2627\_Nigeria\_, LT604964\_genotype\_6\_CG\_dFr3006\_Cote\_dIvoire\_,  
JX888102\_genotype\_6\_CG\_Nigeria\_2006, LT594484\_genotype\_6\_CG\_dFr1594\_Angola\_,  
AM183332\_genotype\_6\_CG\_dFr2139\_CenAfrRep\_, MG711671\_genotype\_6\_CG\_Cameroon\_2013,  
MG711710\_genotype\_6\_CG\_Cameroon\_2013, MG711777\_genotype\_6\_CG\_Cameroon\_2011,  
MG711730\_genotype\_6\_CG\_Cameroon\_2016, KY861353\_genotype\_6\_CG\_Cameroon\_25-Mar\_2008,  
MG711780\_genotype\_6\_CG\_Cameroon\_2011, AJ309880\_gen2\_Partial\_CG\_Russia, HW649777\_gen2\_CG,  
LT604953\_gen2\_CG\_Yakut-6\_Russia\_, AJ309879\_gen2\_Partial\_CG\_Russia\_, MK234594\_gen2\_CG\_Taiwan\_,  
X60193\_gen2\_CG, MA997213\_gen2\_CG, AF104264\_gen2\_CG\_TW2476\_Taiwan\_, AF425645\_gen2\_CG,  
AY261459\_gen2\_CG, AY261457\_gen2\_CG, AY261460\_gen2\_CG, AY261458\_gen2\_CG,  
MK234591\_gen2\_CG\_Taiwan\_, MK234592\_gen2\_CG\_Taiwan\_, MK234593\_gen2\_CG\_Taiwan\_,  
LT594481\_gen2\_CG\_dFr5820\_China\_, KF660599\_gen2\_CG\_Viet\_Nam\_, MG557659\_gen2\_CG\_Taiwan\_,  
MG557658\_gen2\_CG\_Taiwan\_, AB118846\_gen2\_CG\_Miyako\_JA-M37\_Japan\_,  
LT604952\_gen2\_CG\_dFr8462\_Viet\_Nam\_, KF660598\_gen2\_CG\_Viet\_Nam\_, AB118834\_gen4\_CG\_Miyako\_JA-

M19\_Japan\_, AB118835\_gen4\_CG\_Miyako\_JA-M20\_Japan\_, AB118819\_gen4\_CG\_Miyako\_JA-M3\_Japan\_,  
 AB118828\_gen4\_CG\_Miyako\_JA-M13\_Japan\_, AB118821\_gen4\_CG\_Miyako\_JA-M5\_Japan\_,  
 AB118825\_gen4\_CG\_Miyako\_JA-M10\_Japan\_, AB118832\_gen4\_CG\_Miyako\_JA-M17\_Japan\_,  
 AB118838\_gen4\_CG\_Miyako\_JA-M24\_Japan\_, AB118839\_gen4\_CG\_Miyako\_JA-M27\_Japan\_,  
 AB118830\_gen4\_CG\_Miyako\_JA-M15\_Japan\_, AB088679\_gen4\_CG\_L215\_, AB118824\_gen4\_CG\_Miyako\_JA-  
 M8\_Japan\_, AB118831\_gen4\_CG\_Miyako\_JA-M16\_Japan\_, AB118823\_gen4\_CG\_Miyako\_JA-M7\_Japan\_,  
 AB118822\_gen4\_CG\_Miyako\_JA-M6\_Japan\_, AF309420\_gen4\_CG\_Miyako\_Japan\_Miyako\_,  
 AB118820\_gen4\_CG\_Miyako\_JA-M4\_Japan\_, AB118833\_gen4\_CG\_Miyako\_JA-M18\_Japan\_,  
 AB118840\_gen4\_CG\_Miyako\_JA-M29\_Japan\_, AB118818\_gen4\_CG\_Miyako\_JA-M2\_Japan\_,  
 AB118827\_gen4\_CG\_Miyako\_JA-M12\_Japan\_, AB118826\_gen4\_CG\_Miyako\_JA-M11\_Japan\_,  
 AB118829\_gen4\_CG\_Miyako\_JA-M14\_Japan\_, AB118836\_gen4\_CG\_Miyako\_JA-M44\_Japan\_,  
 AB118837\_gen4\_CG\_Miyako\_JA-M23\_Japan\_, AB118842\_gen4\_CG\_Miyako\_JA-M32\_Japan\_,  
 AB118843\_gen4\_CG\_Miyako\_JA-M33\_Japan\_, AB118844\_gen4\_CG\_Miyako\_JA-M34\_Japan\_,  
 AB118841\_gen4\_CG\_Miyako\_JA-M31\_Japan\_, AF209859\_gen4\_CG\_Taiwan\_, AB118847\_gen4\_CG\_Tokyo\_JA-  
 T\_Japan\_, AY648952\_gen4\_CG\_Taiwan\_, AY648953\_gen4\_CG\_Taiwan\_,  
 AF018077\_gen4\_CG\_TW\_2b\_Taiwan\_isolate\_, AY648954\_gen4\_CG\_Taiwan\_, AY648955\_gen4\_CG\_Taiwan\_,  
 AB118845\_gen4\_CG\_Miyako\_JA-M36\_Japan\_, MG711789\_gen7\_CG\_Cameroon\_2011,  
 MG711680\_gen7\_CG\_Cameroon\_2014, MG711760\_gen7\_CG\_Cameroon\_2015,  
 MG711765\_gen7\_CG\_Cameroon\_2016, MG711685\_gen7\_CG\_Cameroon\_2016,  
 MG711711\_gen7\_CG\_Cameroon\_2013, MG711714\_gen7\_CG\_Cameroon\_2013,  
 MG711772\_gen7\_CG\_Cameroon\_2016, MG711751\_gen7\_CG\_Cameroon\_2013,  
 MG711773\_gen7\_CG\_Cameroon\_2016, MG711739\_gen7\_CG\_Cameroon\_2013,  
 MG711790\_gen7\_CG\_Cameroon\_2011, MG711741\_gen7\_CG\_Cameroon\_2013,  
 MG711779\_gen7\_CG\_Cameroon\_2011, MG711735\_gen7\_CG\_Cameroon\_2016,  
 MG711781\_gen7\_CG\_Cameroon\_2011, MG711804\_gen7\_CG\_Cameroon\_2015,  
 MG711729\_gen7\_CG\_Cameroon\_2016, MG711754\_gen7\_CG\_Cameroon\_2014,  
 MG711768\_gen7\_CG\_Cameroon\_2016, MG711723\_gen7\_CG\_Cameroon\_2016,  
 MG711679\_gen7\_CG\_Cameroon\_2014, MG711786\_gen7\_CG\_Cameroon\_2011,  
 MG711689\_gen7\_CG\_Cameroon\_2016, MG711783\_gen7\_CG\_Cameroon\_2011,  
 MG711799\_gen7\_CG\_Cameroon\_2010, MG711724\_gen7\_CG\_Cameroon\_2016,  
 MG711758\_gen7\_CG\_Cameroon\_2015, MG711791\_gen7\_CG\_Cameroon\_2011,  
 MG711699\_gen7\_CG\_Cameroon\_2015, AM183333\_gen7\_CG\_dFr2158\_Cameroon\_,  
 LT604970\_gen7\_CG\_dFr3363\_Cameroon\_, LT604971\_gen7\_CG\_dFr3836\_Cameroon\_,  
 MG711695\_gen7\_CG\_Cameroon\_2015, KM110803\_gen7\_CG\_Cameroon\_, KM110805\_gen7\_CG\_Cameroon\_,  
 LT594487\_gen7\_CG\_dFr1650\_Cameroon\_, KM110804\_gen7\_CG\_Cameroon\_,  
 LT594486\_gen7\_CG\_dFr1200\_Cameroon\_, LT604969\_gen7\_CG\_dFr2202\_Cameroon\_,  
 MG711682\_gen7\_CG\_Cameroon\_2015, LT604972\_gen7\_CG\_dFr4797\_Cameroon\_,  
 MG711795\_gen7\_CG\_Cameroon\_2011, KM110802\_gen7\_CG\_Cameroon\_, MG711670\_gen7\_CG\_Cameroon\_2013,  
 AM183327\_gen8\_CG\_dFr2736\_Cote\_dIvoire\_, AM183330\_gen8\_CG\_dFr2072\_Senegal\_,  
 LT604974\_gen8\_CG\_dFr3111\_Republic\_of\_the\_Congo\_, GU177114\_gen8\_CG\_Gabon\_,  
 LT594488\_gen8\_CG\_dFr7707\_Congo\_, LT604973\_gen8\_CG\_dFr2790\_Congo\_, L22063\_gen3\_CG\_genotype\_III\_,  
 HW649778\_gen3\_CG, HF679404\_gen3\_CG\_Brazil\_, HF679405\_gen3\_CG\_Brazil\_, HF679406\_gen3\_CG\_Brazil\_,  
 KC590319\_gen3\_CG\_Brazil\_10-Jun\_2011, LT604955\_gen3\_CG\_dFr8790\_Brazil\_, AB037949\_gen3\_CG\_Venezuela\_,  
 AB037947\_gen3\_CG\_Venezuela\_, AB037948\_gen3\_CG\_Venezuela\_, LT604954\_gen3\_CG\_dFr6727\_Bolivia

### List of Dated HDV-1 Reference Sequences

MK976686\_gen1\_Pakistan\_Jan\_2018, MG711748\_gen1\_Cameroon\_2013, MG711797\_gen1\_Cameroon\_2010, MG711755  
 \_gen1\_Cameroon\_2014, MG711694\_gen1\_Cameroon\_2015, MG711805\_gen1\_Cameroon\_2015, JX888108\_gen1\_Chad\_2  
 007, MK890225\_gen1\_Pakistan\_Aug\_2018, JX888110\_gen1\_CAR\_2009, JX888099\_gen1\_Nigeria\_2006, KJ744230\_gen1  
 \_Iran\_Oct\_2004, MH457151\_Italy\_2018, AM902179\_1e\_dFr2042\_Italy\_2006, MK124579\_gen1\_Italy\_1984, HM046802\_  
 gen1\_China\_21\_Dec\_2009, KJ744234\_gen1\_Iran\_Feb\_2008, KT722840\_gen1\_China\_12\_Aug\_2014, MG926377\_gen1d\_  
 Israel\_19\_Dec\_2012, KJ744214\_gen1\_Iran\_Mar\_2008, KJ744224\_gen1\_Iran\_Feb\_2010, KY379247\_gen1\_Canada\_08\_Ju  
 l\_2015, MG926381\_gen1d\_Israel\_25\_Jun\_2015, MH791030\_gen1\_Russia\_Jul\_2017, KJ744221\_gen1\_Iran\_Sep\_2007, LC  
 426721\_gen1\_Mongolia\_2018, KJ744231\_gen1\_Iran\_Jun\_2009, KJ744257\_gen1\_Iran\_Jan\_2008, KJ744248\_gen1\_Iran\_A  
 pr\_2010, KJ744255\_gen1\_Iran\_Apr\_2003, KJ744256\_gen1\_Iran\_Oct\_2005, MG926378\_gen1d\_Israel\_06\_Feb\_2013, MG9

26379\_gen1d\_Israel\_01\_Jan\_2013,KJ744253\_gen1\_Iran\_Feb\_2007,JX888098\_gen1\_Nigeria\_2004,KJ744235\_gen1\_Ira  
n\_Feb\_2008,KJ744245\_gen1\_Iran\_May\_2006,KY463680\_gen1\_Ethiopia\_2013,KY463682\_gen1\_Ethiopia\_2013,MG71  
1800\_gen1\_Cameroon\_2012,JX888109\_gen1\_Chad\_2007,MG711717\_gen1\_Cameroon\_2014,JX888113\_gen1\_CAR\_20  
09,KY463677\_gen1\_Ethiopia\_2013,MK976678\_gen1\_Pakistan\_Dec\_2017,KY861354\_gen1\_Cameroon\_2009,KJ744241  
\_gen1\_Iran\_Feb\_2008,MK890224\_gen1\_Pakistan\_Apr\_2018,MG711767\_gen1\_Cameroon\_2016,MG711770\_gen1\_Cam  
eroon\_2016,MG711727\_gen1\_Cameroon\_2016,MG711784\_gen1\_Cameroon\_2011,MG711672\_gen1\_Cameroon\_2013,  
MG711697\_gen1\_Cameroon\_2012,KY861351\_gen1\_Cameroon\_12\_Jan\_2008
