# Supplementary material for: Phylogenetic and Phylodynamic Analysis of Delta Strains Circulating in Italy
Source: MDPI journal article supplement (doi:10.3390/v15091791), 2023-08-23
Supplement: s1 [file s1]

Table S2. Demographic Characteristics of The Study Population.

| Patient | Patient Identifier | Age (y) | Gender | Country       | Data collection | HBVDNA (IU/ml) |
|---------|--------------------|---------|--------|---------------|-----------------|----------------|
| Pt3     | Pt3D_ARMA_2019     | NA      | M      | AL            | 18/10/2019      | 9830           |
| Pt4     | Pt4D_SACR_2019     | 55      | F      | It            | 13/06/2019      | <10            |
| Pt5     | Pt5D_BALI_2019     | 56      | F      | It            | 09/04/2019      | <10            |
| Pt11    | Pt11D_BOGE_2020    | NA      | M      | Ro            | 16/10/2020      | Not detected   |
| Pt13    | Pt13D_CAOX_2016    | 44      | F      | Mo            | 14/10/2016      | Not detected   |
| Pt14    | Pt14D_COMI_2018    | 59      | M      | Ro            | 06/11/2018      | <10            |
| Pt16    | Pt16D_DEMAS_2018   | 58      | F      | It            | 10/09/2018      | <10            |
| Pt18    | Pt18D_DICA_2019    | 42      | F      | Mo            | 10/07/2019      | 1910           |
| Pt19    | Pt19D_DONA_2018    | 56      | F      | Mo            | 13/02/2018      | <10            |
| Pt22    | Pt22D_GALI_2019    | 43      | F      | It            | 04/12/2019      | <10            |
| Pt26    | Pt26D_GHVA_2019    | 65      | M      | Ro            | 02/03/2019      | <10            |
| Pt27    | Pt27D_IANI_2018    | 52      | F      | Mo            | 03/11/2018      | 37             |
| Pt28    | Pt28D_IAIU_2018    | 34      | M      | Ro            | 31/05/2018      | <10            |
| Pt29    | Pt29D_IAFR_2019    | 67      | M      | It            | 18/10/2019      | 56             |
| Pt32    | Pt32D_MIDO_2018    | 66      | F      | Ro            | 06/12/2018      | <10            |
| Pt33    | Pt33D_MIDA_2018    | NA      | M      | Ro)           | 12/09/2018      | <10            |
| Pt34    | Pt34D_MIDU_2019    | 59      | M      | Ro            | 30/08/2019      | <10            |
| Pt35    | Pt35D_MOVI_2016    | 40      | M      | Ro            | 28/11/2016      | <10            |
| Pt37    | Pt37D_MUAA_2018    | 29      | F      | Ro            | 31/07/2018      | <10            |
| Pt38    | Pt38D_NEAF_2019    | 32      | M      | Sri Lanka     | 18/11/2019      | Not detected   |
| Pt39    | Pt39D_OCSI_2018    | 47      | F      | It            | 02/03/2018      | 24             |
| Pt40    | Pt40D_ONCO_2020    | 32      | M      | Ng            | 14/01/2020      | <10            |
| Pt41    | Pt41D_OUGR_2018    | 26      | M      | Tg            | 24/07/2018      | <10            |
| Pt43    | Pt43D_PEBR_2018    | 70      | M      | It            | 13/06/2018      | Not detected   |
| Pt44    | Pt44D_PIGI_2021    | 62      | F      | It            | 15/11/2016      | <10            |
| Pt46    | Pt46D_PICA_2018    | 57      | M      | It            | 18/12/2018      | <10            |
| Pt47    | Pt47D_PONI_2020    | 51      | F      | Ro            | 01/02/2020      | <10            |
| Pt48    | Pt48D_QUSA_2018    | 58      | M      | It            | 09/03/2018      | <10            |
| Pt50    | Pt50D_SIRO_2020    | 32      | F      | Ro            | 28/09/2020      | < 10           |
| Pt51    | Pt51D_SOPI_2019    | 65      | M      | It            | 11/12/2019      | <10            |
| Pt52    | Pt52D_SUOL_2018    | 32      | F      | Mo            | 19/12/2018      | <10            |
| Pt54    | Pt54D_TIGA_2016    | 42      | M      | It            | 17/10/2016      | 6937           |
| Pt55    | Pt55D_TRVA_2018    | 58      | F      | Mo            | 12/12/2018      | Not detected   |
| Pt56    | Pt56D_TRAN_2018    | 53      | M      | It            | 14/05/2018      | <10            |
| Pt57    | Pt57D_VATU_2018    | 55      | M      | Ro            | 17/12/2018      | 210            |
| Pt58    | Pt58D_VEMA_2018    | 60      | M      | It            | 31/12/2018      | <10            |
| Pt59    | Pt59D_VIMG_2019    | 57      | F      | It            | 08/02/2019      | 45             |
| Pt60    | Pt60D_ZIYJ_2020    | 59      | F      | Rep_Dem_Congo | 15/02/2020      | 123            |
| Pt61    | Pt61D_BAEL_2020    | 65      | F      | Ro            | 24/09/2020      | <10            |
| Pt63    | Pt63D_OLIO_2021    | 46      | M      | Ro            | 02/04/2021      | 641            |
| Pt65    | Pt65D_ENAN_2018    | 52      | M      | It            | 30/11/2018      | Not detected   |
| Pt66    | Pt66D_CIAN_2021    | 57      | F      | It            | 15/06/2021      | Not detected   |
| Pt67    | Pt67D_GAOV_2021    | 33      | M      | It            | 15/06/2021      | <10            |
| Pt68    | Pt68D_ALMA_2018    | 36      | M      | Ro            | 10/12/2018      | Not detected   |
| Pt69    | Pt69D_DEMI_2020    | 34      | F      | Al            | 13/01/2020      | Not detected   |
| Pt70    | Pt70D_FEFA_2019    | 63      | M      | It            | 26/09/2019      | Not detected   |
| Pt71    | Pt71D_GAAN_2018    | 40      | M      | Mo            | 01/03/2018      | <10            |
| Pt75    | Pt75D_SAYU_2018    | 42      | F      | Ru            | 21/08/2018      | 80620          |
| Pt76    | Pt76D_MAMA_2021    | 65      | M      | It            | 26/05/2021      | Not detected   |
| Pt78    | Pt78D_SIRO_2021    | 33      | F      | Ro            | 24/04/2021      | 20             |

Ro, Romania; Al, Albania; NG, Nigeria; It, Italy; Tg, Togo; Rep\_Dem\_Congo, Democratic Republic of the Congo; Mo, Republic of Moldova; Ru, Russian Federation.
