# Supplementary material for: Phylogenetic and Phylodynamic Analysis of Delta Strains Circulating in Italy
Source: MDPI journal article supplement (doi:10.3390/v15091791), 2023-08-23

Supplementary Figure S2

For HDV sequences with available information on the date of sampling (n= 102), a Maximum Likelihood tree was generated with 100 bootstrap replicates and partial deletion (90% site coverage cutoff). Reference sequences are colored black, while Italian and non-Italian sequence names are colored blue. The tree was inferred with RAXML v8 and visualized with Figtree v1.4.4. Graphic illustration was implemented with Adobe Illustrator 2023.

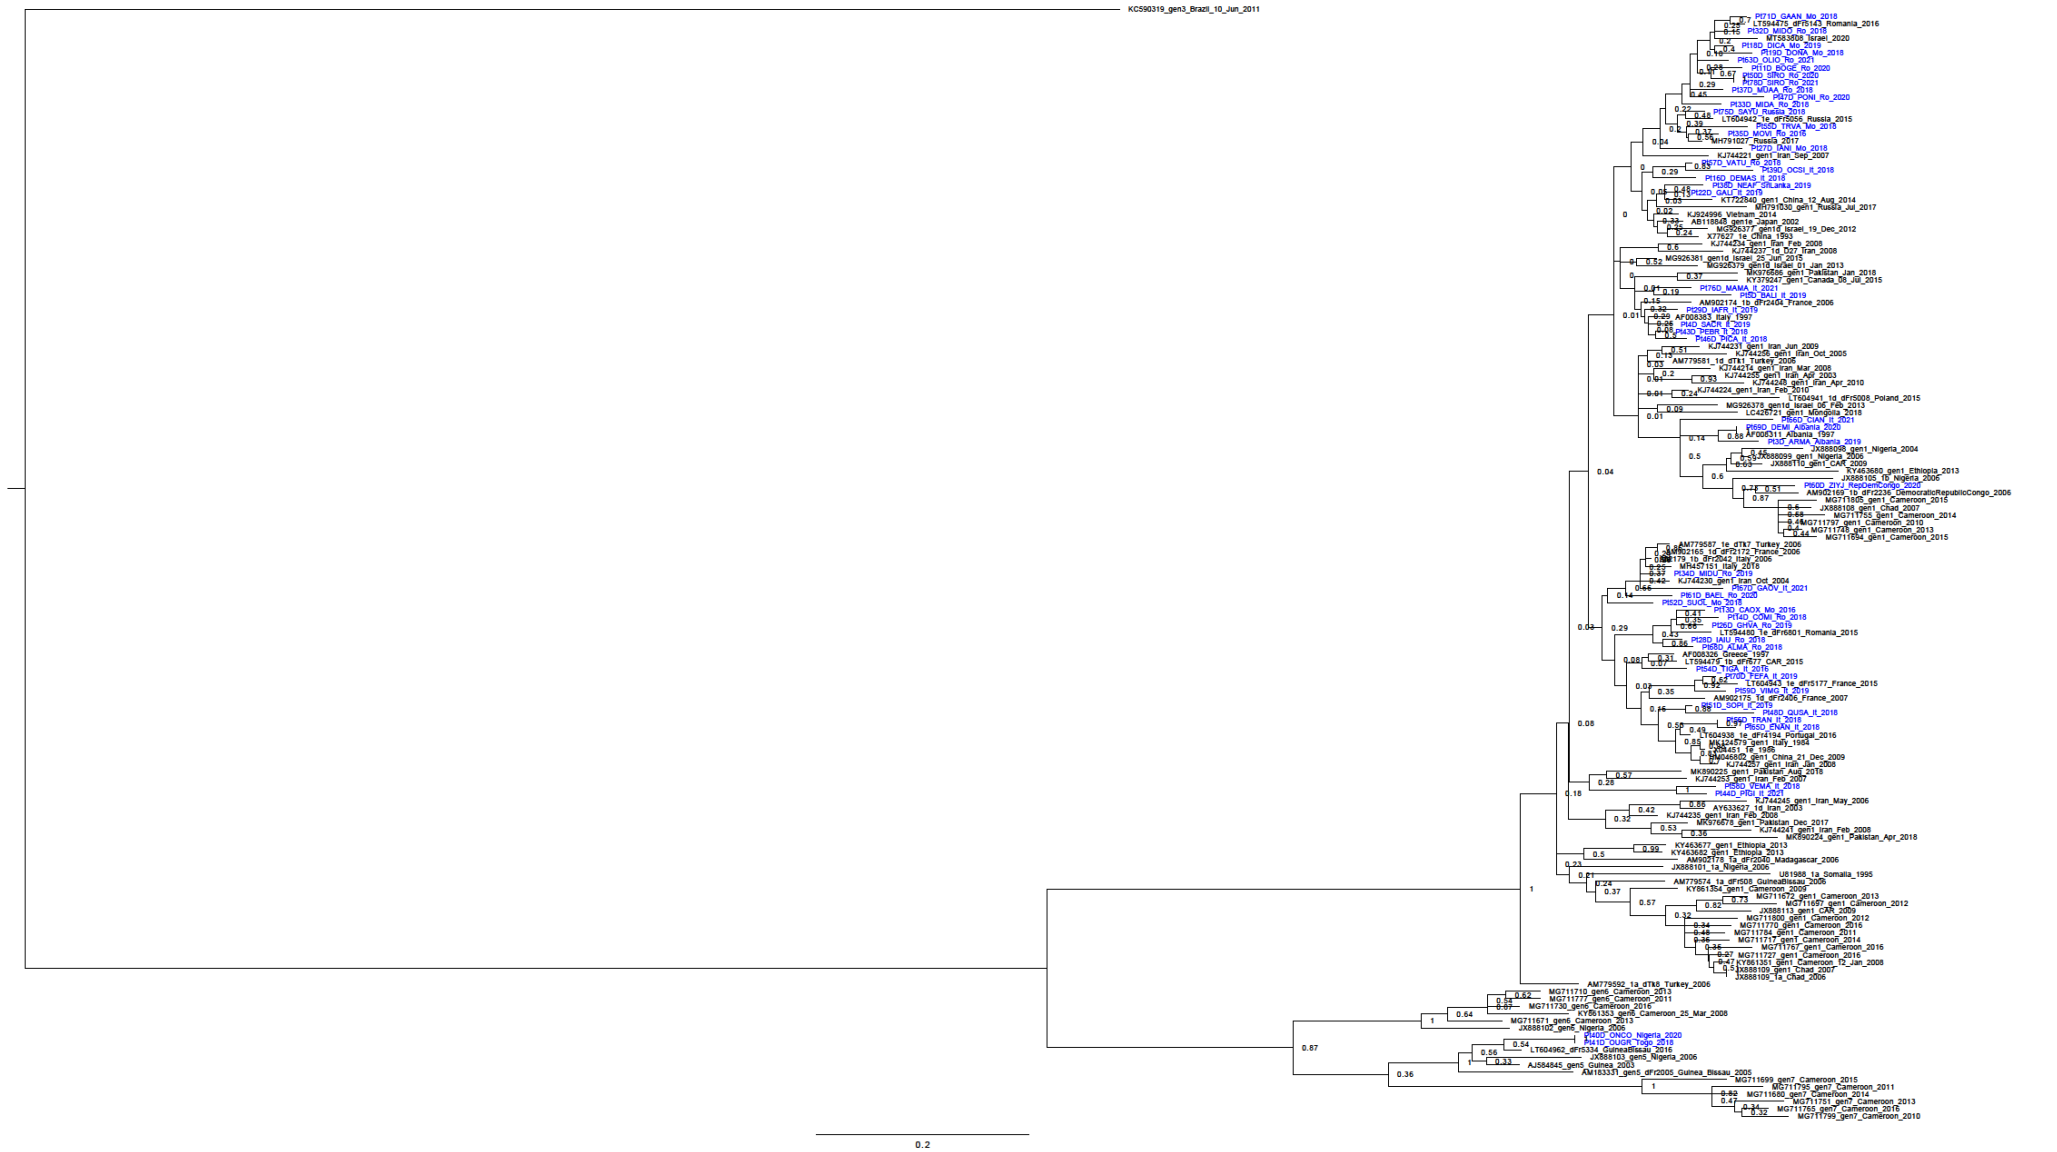

Supplement: s1 [file s1]
