# Supplementary material for: Phylogenetic and Phylodynamic Analysis of Delta Strains Circulating in Italy
Source: Viruses. 2023 Aug 23;15(9):1791. doi: 10.3390/v15091791 (PMC10537423; doi:10.3390/v15091791)
Supplement: Supplementary file 1 [file viruses-15-01791-s001.zip]

Archive with 4 entries (4 files):
- Supplementary Figure S1.pdf
- Supplementary Figure S2.pdf
- Supplementary Table S1. List of Reference sequences.pdf
- Supplementary Table S2. Demographic characteristics of study population.pdf
